# Supplementary material
Source: PubMed Central journal article supplement (PMC6639542)
Supplement: supporting_table_s1_cwz037.pdf [file supporting_table_s1_cwz037.pdf]

**Supporting Table S1. Primers for qPCR analysis.**

| <b>Gene</b>   | <b>Primer Forward (5'-3')</b> | <b>Reverse Primer (5'-3')</b>                |
|---------------|-------------------------------|----------------------------------------------|
| <i>EXT1</i>   | CTCAGCAATGGATGGGAGTT          | TCCTCCAGGATGTTTGTTC                          |
| <i>EXT2</i>   | AGAACACACTGCGCATCAAG          | TCTGGAAGATCCACCTCAGC                         |
| <i>NDST1</i>  | TCACCTTCAACCTGGGCTAC          | ACGGACTGGTTGTGGAAAAG                         |
| <i>NDST2</i>  | ATCATCACAGTGCTCACCAACCCT      | AGCCAGCGTTGTAGATGGGTAGAA                     |
| <i>NDST3</i>  | TCAGGGAAGAGGCTGACATT          | ATCCACAGACCCCAACAGAC                         |
| <i>NDST4</i>  | CCACCTCTTCCACAACGAGT          | GGCAGGTTTCAGATGTGGAT                         |
| <i>HS2ST</i>  | TGGAAAGAGATGAAACCAGGA         | CAGAGCTTCTCTGGAGCACA                         |
| <i>HS6ST1</i> | AAGAAGTGCACCTGCTACC           | CGCCCATCACACATATGCAA                         |
| <i>HS6ST2</i> | CCGTCCAGGAACTTCCACTA          | GACCAGTCATCGCCAGTGTA                         |
| <i>HS6ST3</i> | CAAGAAGGAGACGTGGCTCT          | GGGCTTCTTCCATCACACAT                         |
| <i>SDC1</i>   | GGAGCAGGACTTCACCTTTG          | TACAGCATGAAACCCACCAG                         |
| <i>SDC2</i>   | GCTGCTCCAAAAGTGGAAC           | CAGCAATGACAGCTGCTAGG                         |
| <i>SDC3</i>   | GAGCCTGACATCCCTGAGAG          | CCCACAGCTACCACCTCATT                         |
| <i>SDC4</i>   | GAGCCCTACCAGACGATGAG          | CAGTGCTGGACATTGACACC                         |
| <i>GPC1</i>   | AGCGAGATGGAGGAGAACCT          | CTGAGTACAGGTCCCAGGAAAG                       |
| <i>GPC2</i>   | TGACTACCTGCTCTGCCTCTC         | GCTTCGCTGACCACATTTCT                         |
| <i>GPC3</i>   | GGCAAGTTATGTGCCATTC           | ATGTAGCCAGGCAAAGCACT                         |
| <i>GCP4</i>   | ATGGTGGCAGAGAGGCTAGA          | GGAACGAGAAATTCGTCCAG                         |
| <i>GPC5</i>   | AAGCCCAGTCTGGAAATCCT          | TCACAGTCCCCACTGACTTG                         |
| <i>GPC6</i>   | CACGTTTCAGGCCCTACAAT          | GTTCCAGCATTCTCCTCGT                          |
| <i>TGFBR3</i> | TGAAGTGACTGGACGAGACG          | AGTGCGGAGATTTCAGGACAT                        |
| <i>COL18</i>  | CTGGGAGGCTCTGTTCTCAG          | CACAGTAGCTCTCGGTCAGC                         |
| <i>SRGN</i>   | GAGCACCTGCTACATTTCC           | CCGCGTAGGATAACCTTGAA                         |
| <i>CD44v3</i> | CTGGGAGCCAAATGAAGAAA          | AGCACTTCCGGATTTGAATG<br>CATTCAAATCCGGAAGTGCT |
| <i>AGRN</i>   | AACCTGGAGGAGGTGGAGTT          | CTTCTTGCAGACGCAGGAC                          |
| <i>HSPG2</i>  | CACTCGCTCCATCGAGTACA          | GATGACCCTGAGCAGCATCT                         |
